# Supplementary material for: Quaternary alkaline-earth metal thiophosphate SrAgPS4: syntheses, structures, and optical properties
Source: Royal Society of Chemistry journal article supplement (doi:10.1039/d3dt00793f), 2023-01-01
Supplement: d3dt00793f1.pdf [file d3dt00793f1.pdf]

## **Quaternary alkaline-earth metal thiophosphate SrAgPS<sub>4</sub>: syntheses, structure, and optical properties**

Wenhao Xing,<sup>†[a]</sup> Jian Tang,<sup>†[a]</sup> Liang Fei,<sup>[b]</sup> Chunlan Tang<sup>[a,c]</sup>, Jieyun Wu<sup>[c]</sup>, Wenlong Yin,<sup>\*[a]</sup> Bin Kang<sup>[a]</sup> and Jianguo Deng<sup>[a]</sup>

a. Institute of Chemical Materials, China Academy of Engineering Physics, Mianyang 621900, People's Republic of China. E-mail: [wlyin@caep.cn](mailto:wlyin@caep.cn)

b. Key Laboratory of Science and Technology on High Energy Laser, China Academy of Engineering Physics, Mianyang 621900, People's Republic of China.

c. Institute of Chemical Materials, China Academy of Engineering Physics, Mianyang 621900, P.R. China.

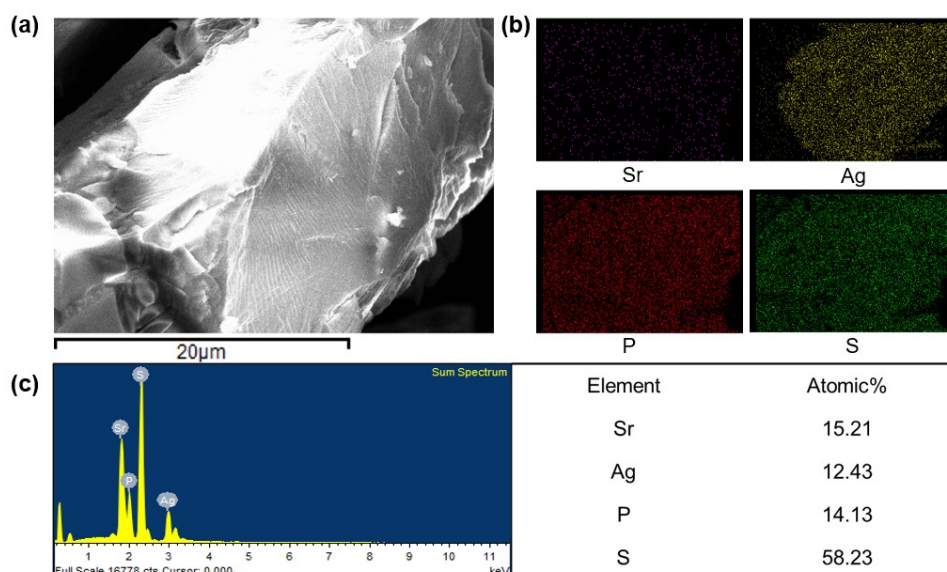

**Figure S1** (a) Scanning electron microscopy (SEM) image of SrAgPS<sub>4</sub>; (b) Elemental distribution of the as-grown crystal (from left to right: Sr, Ag, P, S). (c) Elemental analysis of SrAgPS<sub>4</sub> by EDX spectroscopy.

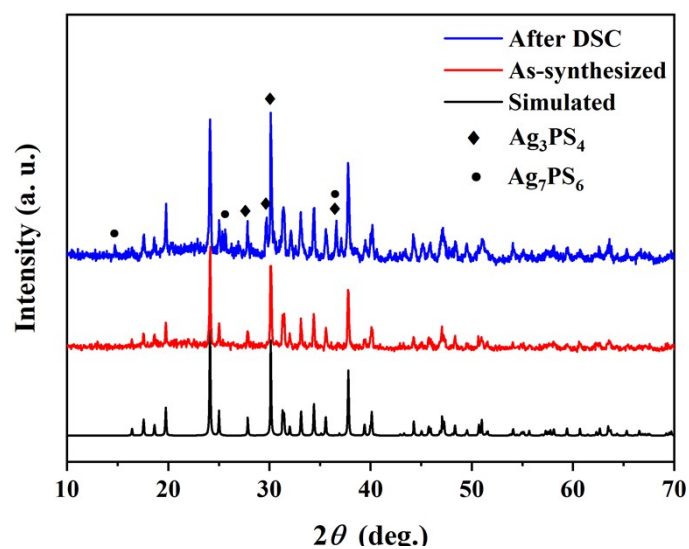

**Figure S2** Powder XRD patterns of SrAgPS<sub>4</sub> before and after differential scanning calorimetry measurement.

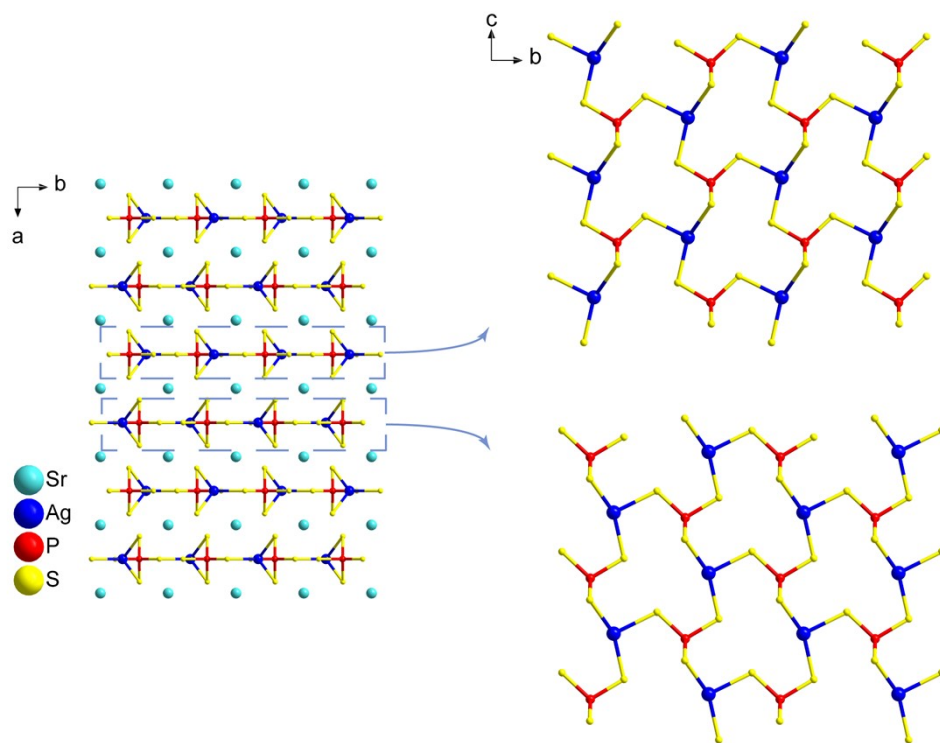

**Figure S3** Two adjacent layers are arranged antiparallel to each other.

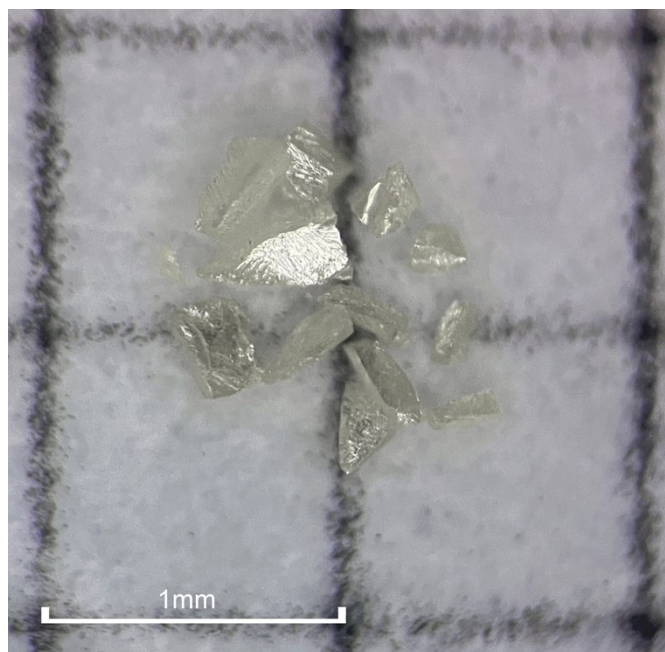

**Figure S4** The Photo of SrAgPS<sub>4</sub> crystals.

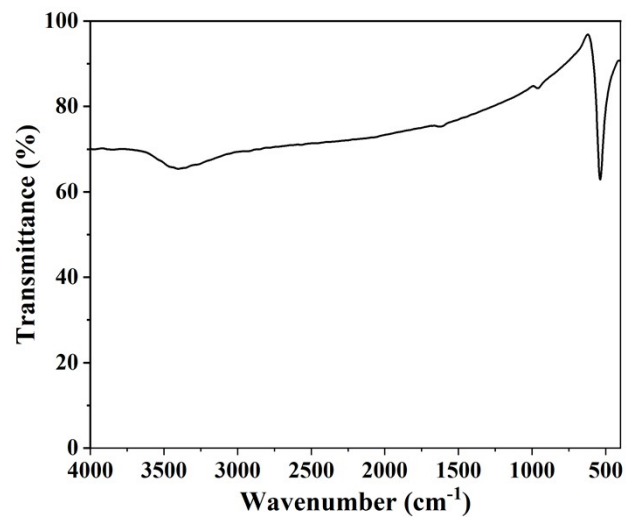

Figure S5 FT-IR spectra for SrAgPS4.

**Table S1** Selected Bond Lengths (Å) and Bond Angles (°) for SrAgPS<sub>4</sub>.

|                                           |             |                                         |             |
|-------------------------------------------|-------------|-----------------------------------------|-------------|
| Sr1—S1                                    | 3.0053 (12) | Ag1A—S2 <sup>vi</sup>                   | 2.761 (5)   |
| Sr1—S1 <sup>i</sup>                       | 3.0053 (12) | Ag1A—S3 <sup>iv</sup>                   | 2.552 (7)   |
| Sr1—S3 <sup>ii</sup>                      | 3.0789 (15) | Ag1B—S1 <sup>vii</sup>                  | 2.469 (5)   |
| Sr1—S3 <sup>iii</sup>                     | 3.0789 (15) | Ag1B—S2 <sup>vi</sup>                   | 2.509 (5)   |
| Sr1—S2 <sup>i</sup>                       | 3.1731 (16) | Ag1B—S3 <sup>iv</sup>                   | 2.622 (7)   |
| Sr1—S2 <sup>iv</sup>                      | 3.1740 (18) | P1—S1                                   | 2.062 (3)   |
| Sr1—S2 <sup>v</sup>                       | 3.1740 (18) | P1—S2                                   | 2.040 (2)   |
| Sr1—S2                                    | 3.1731 (17) | P1—S2 <sup>vii</sup>                    | 2.040 (2)   |
| Ag1A—S1                                   | 2.473 (6)   | P1—S3                                   | 2.049 (3)   |
|                                           |             |                                         |             |
| S1—Ag1A—S3 <sup>iv</sup>                  | 104.0 (3)   | S1—Ag1B—S3 <sup>iv</sup>                | 102.1 (2)   |
| S1—Ag1A—S2 <sup>viii</sup>                | 136.89 (15) | S1—Ag1B—S2 <sup>vi</sup>                | 156.1 (3)   |
| S1—Ag1A—S2 <sup>vi</sup>                  | 136.89 (15) | S2 <sup>vi</sup> —Ag1B—S3 <sup>iv</sup> | 101.76 (18) |
| S3 <sup>iv</sup> —Ag1A—S2 <sup>vi</sup>   | 96.99 (18)  | S3—P1—S1                                | 106.05 (14) |
| S3 <sup>iv</sup> —Ag1A—S2 <sup>viii</sup> | 96.99 (18)  | S2 <sup>vii</sup> —P1—S1                | 107.32 (8)  |
| S2 <sup>vi</sup> —Ag1A—S2 <sup>viii</sup> | 75.22 (17)  | S2—P1—S1                                | 107.32 (8)  |
| Sr1 <sup>ix</sup> —Ag1B—Sr1 <sup>x</sup>  | 101.5 (4)   | S2—P1—S3                                | 112.18 (9)  |
| S1—Ag1B—Sr1 <sup>x</sup>                  | 102.4 (3)   | S2 <sup>vii</sup> —P1—S3                | 112.18 (9)  |
| S1—Ag1B—Sr1 <sup>ix</sup>                 | 140.9 (7)   | S2—P1—S2 <sup>vii</sup>                 | 111.41 (15) |

Symmetry codes: (i)  $-x+1, -y+1, z$ ; (ii)  $-x+1, -y+3/2, z-1/2$ ; (iii)  $x, y-1/2, z-1/2$ ; (iv)  $x, y-1/2, z+1/2$ ; (v)  $-x+1, -y+3/2, z+1/2$ ; (vi)  $-x+3/2, y, z+1$ ; (vii)  $-x+3/2, y, z$ ; (viii)  $x, y, z+1$ ; (ix)  $x+1/2, -y+1, z+1$ ; (x)  $x+1/2, -y+3/2, z+1/2$ .

**Table S2** Fractional Atomic Coordinates ( $\times 10^4$ ) and Equivalent Isotropic Displacement Parameters ( $\text{\AA}^2 \times 10^3$ ) for SrAgPS<sub>4</sub>.  $U_{\text{eq}}$  is defined as 1/3 of the trace of the orthogonalised  $U_{ij}$  tensor.

| <b>Atom</b>      | <b>Wyckoff site</b> | <b>Occupancy</b> | <b><i>x</i></b> | <b><i>y</i></b> | <b><i>z</i></b> | <b>U(eq)</b> |
|------------------|---------------------|------------------|-----------------|-----------------|-----------------|--------------|
| Sr <sup>1</sup>  | 4a                  | 1                | 5000            | 5000            | 2962.4(17)      | 16.6(3)      |
| Ag <sup>1A</sup> | 4b                  | 0.50(5)          | 7500            | 6626(7)         | 8624(9)         | 47(4)        |
| Ag <sup>1B</sup> | 8c                  | 0.25(3)          | 8170(30)        | 6560(9)         | 8489(13)        | 54(4)        |
| P <sup>1</sup>   | 4b                  | 1                | 7500            | 7861.8(19)      | 3208(4)         | 8.7(5)       |
| S <sup>1</sup>   | 4b                  | 1                | 7500            | 6093(2)         | 4851(4)         | 11.9(5)      |
| S <sup>2</sup>   | 8c                  | 1                | 5830.8(18)      | 7886.3(16)      | 1413(3)         | 16.6(4)      |
| S <sup>3</sup>   | 4b                  | 1                | 7500            | 9349(2)         | 5402(4)         | 15.4(5)      |

**Table S3** Bond valence sums for SrAgPS<sub>4</sub>.

| <b>Atom</b> | <b>Valence</b> | <b>BVSum</b> |
|-------------|----------------|--------------|
| Sr1         | 2.000          | 2.011        |
| Ag1A        | 1.000          | 1.044        |
| Ag1B        | 1.000          | 1.083        |
| P1          | 5.000          | 5.206        |
| S1          | -2.000         | 2.292        |
| S2          | -2.000         | 2.111        |
| S3          | -2.000         | 1.939        |

**Table S4** Structure and properties comparison of SrCdGeS<sub>4</sub>-type compounds crystallized in the orthorhombic system space group of *Ama2*.

| Compounds              | Space Group | E <sub>g</sub> (eV) | SHG (×AGS) | Phase-matching | Congruent-melting (T <sub>m</sub> /T <sub>c</sub> ) | Ref.      |
|------------------------|-------------|---------------------|------------|----------------|-----------------------------------------------------|-----------|
| SrCdGeS <sub>4</sub>   | <i>Ama2</i> | 2.6                 | 1.7        | yes            | 987/946                                             | [1]       |
| EuCdGeS <sub>4</sub>   | <i>Ama2</i> | 2.5                 | 2.6        | yes            | 997/864                                             | [2]       |
| EuCdGeSe <sub>4</sub>  | <i>Ama2</i> | 2.25                | 3.8        | yes            | 882/723                                             | [2]       |
| BaHgGeSe <sub>4</sub>  | <i>Ama2</i> | 2.49                | 4.7        | yes            | 732/589                                             | [3]       |
| SrHgGeSe <sub>4</sub>  | <i>Ama2</i> | 2.42                | 4.8        | yes            | 745/684                                             | [3]       |
| β-BaHgSnS <sub>4</sub> | <i>Ama2</i> | 2.77                | 2.8        | yes            | no                                                  | [4]       |
| SrHgSnS <sub>4</sub>   | <i>Ama2</i> | 2.72                | 1.9        | yes            | no                                                  | [4]       |
| EuHgGeS <sub>4</sub>   | <i>Ama2</i> | 2.04                | 0.9        | yes            | -                                                   | [5]       |
| EuHgGeSe <sub>4</sub>  | <i>Ama2</i> | 1.97                | 3.1        | yes            | 764/651                                             | [6]       |
| EuHgSnS <sub>4</sub>   | <i>Ama2</i> | 2.14                | 1.77       | yes            | no                                                  | [6]       |
| SrAgAsS <sub>4</sub>   | <i>Ama2</i> | 2.31                | 1.35       | yes            | no                                                  | [7]       |
| SrAgPS <sub>4</sub>    | <i>Ama2</i> | 2.97                | 1.10       | yes            | no                                                  | This work |

## Reference

- [1] Y. Dou, Y. Chen, Z. Li, A.K. Iyer, B. Kang, W. Yin, J. Yao, A. Mar, SrCdGeS<sub>4</sub> and SrCdGeSe<sub>4</sub>: Promising Infrared Nonlinear Optical Materials with Congruent-Melting Behavior, *Cryst. Growth Des.* 19 (2019) 1206-1214.
- [2] Y. Guo, F. Liang, W. Yin, Z. Li, X. Luo, Z.-S. Lin, J. Yao, A. Mar, Y. Wu, BaHgGeSe<sub>4</sub> and SrHgGeSe<sub>4</sub>: Two New Hg-Based Infrared Nonlinear Optical Materials, *Chem. Mater.* 31 (2019) 3034-3040.
- [3] W. Xing, N. Wang, Y. Guo, Z. Li, J. Tang, K. Kang, W. Yin, Z. Lin, J. Yao, B. Kang, Two rare-earth-based quaternary chalcogenides EuCdGeQ<sub>4</sub> (Q = S, Se) with strong second-harmonic generation, *Dalton Trans.* 48 (2019) 17620-17625.
- [4] Y. Guo, F. Liang, Z. Li, W. Xing, Z.-s. Lin, J. Yao, A. Mar, Y. Wu, AHgSnQ<sub>4</sub> (A = Sr, Ba; Q = S, Se): A Series of Hg-Based Infrared Nonlinear-Optical Materials with Strong Second-Harmonic-Generation Response and Good Phase Matchability, *Inorg. Chem.* 58 (2019) 10390-10398.
- [5] M. Yan, Z.-D. Sun, W.-D. Yao, W. Zhou, W. Liu, S.-P. Guo, A highly distorted HgS<sub>4</sub> tetrahedron-induced moderate second-harmonic generation response of EuHgGeS<sub>4</sub>, *Inorg. Chem. Front.* 7 (2020) 2451-2458.
- [6] W. Xing, C. Tang, N. Wang, C. Li, Z. Li, J. Wu, Z. Lin, J. Yao, W. Yin, B. Kang, EuHgGeSe<sub>4</sub> and EuHgSnS<sub>4</sub>: Two Quaternary Eu-Based Infrared Nonlinear Optical Materials with Strong Second-Harmonic-Generation Responses, *Inorg. Chem.* 59 (2020) 18452-18460.
- [7] J. Tang, F. Liang, C. Tang, W. Xing, J. Wu, W. Yin, B. Kang, J. Deng, SrAgAsS<sub>4</sub>: A Noncentrosymmetric Sulfide with Good Infrared Nonlinear Optical Performance Induced by Aliovalent Substitution from Centrosymmetric SrGa<sub>2</sub>S<sub>4</sub>, *Inorg. Chem.* 61 (2022) 9205-9212.
